# Supplementary material
Source: PubMed Central journal article supplement (PMC6199660)
Supplement: ba022723-suppl1.pdf [file ba022723-suppl1.pdf]

## **Supplemental Data**

Supplement to: Kawakami T, et al. Frequent *STAT3* mutations in CD8<sup>+</sup> T cells from patients with pure red cell aplasia

### **Contents:**

|                        |         |
|------------------------|---------|
| Supplemental Figure S1 | page 2  |
| Supplemental Figure S2 | page 3  |
| Supplemental Figure S3 | page 4  |
| Supplemental Figure S4 | page 6  |
| Supplemental Figure S5 | page 7  |
| Supplemental Figure S6 | page 9  |
| Supplemental Table S1  | page 11 |
| Supplemental Table S2  | page 12 |
| Supplemental Table S3  | page 13 |
| Supplemental Table S4  | page 14 |
| Supplemental Table S5  | page 15 |
| Supplemental Table S6  | page 16 |
| Supplemental Table S7  | page 17 |

**Supplemental Figure S1.**

**A Nagano and Kanazawa cohort (n= 104)**

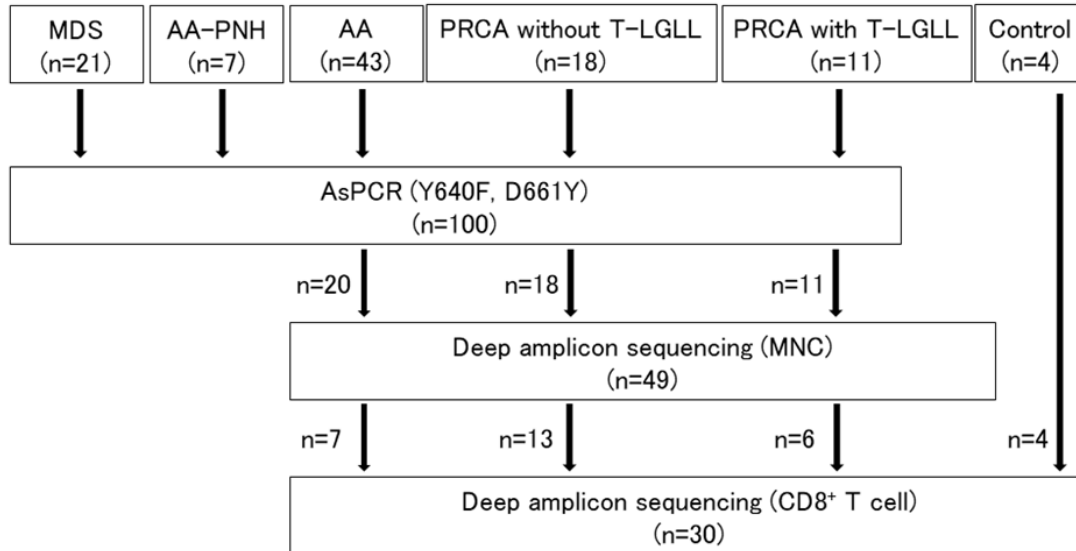

**B Akita cohort (n= 24)**

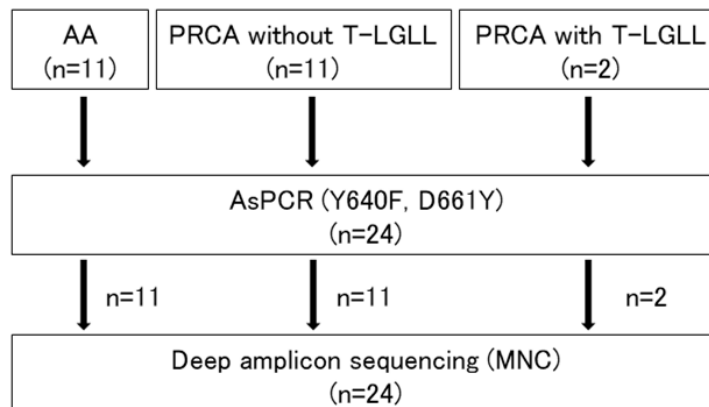

**Design of this study.** A: Nagano and Kanazawa cohort in which clinical data of the patients were available. B: Akita cohort in which DNA samples and the diagnosis of the patients available.

AsPCR: allele-specific PCR, MNC: mononuclear cell

**Supplemental Figure S2.**

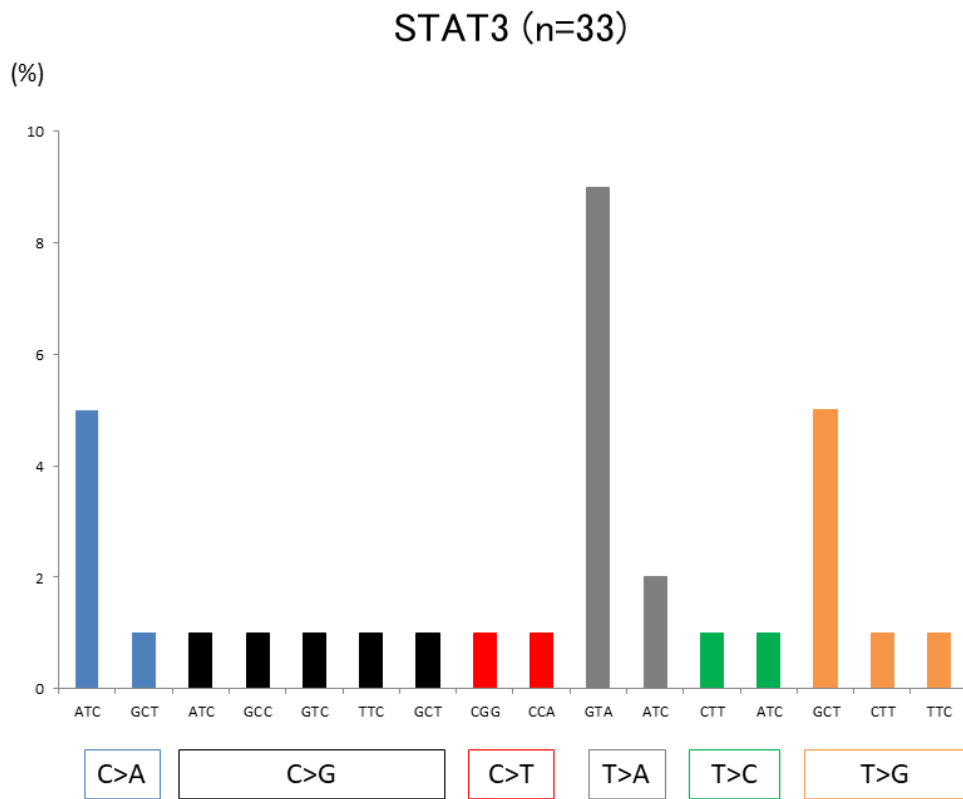

**The nucleotide substitution patterns of *STAT3* mutations with targeted sequencing.** The types of nucleotide substitution were tallied manually and classified with different colors.

Supplemental Figure S3.

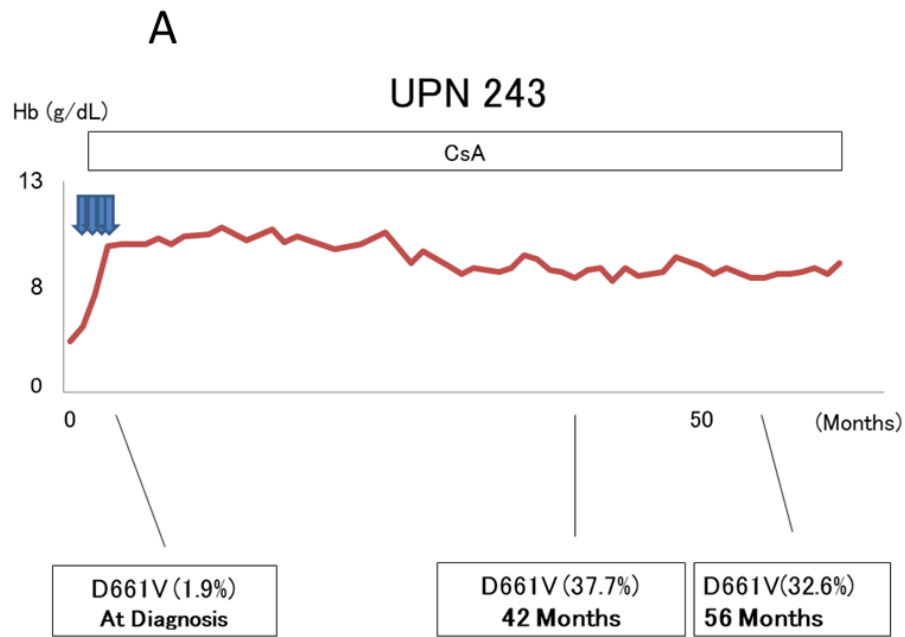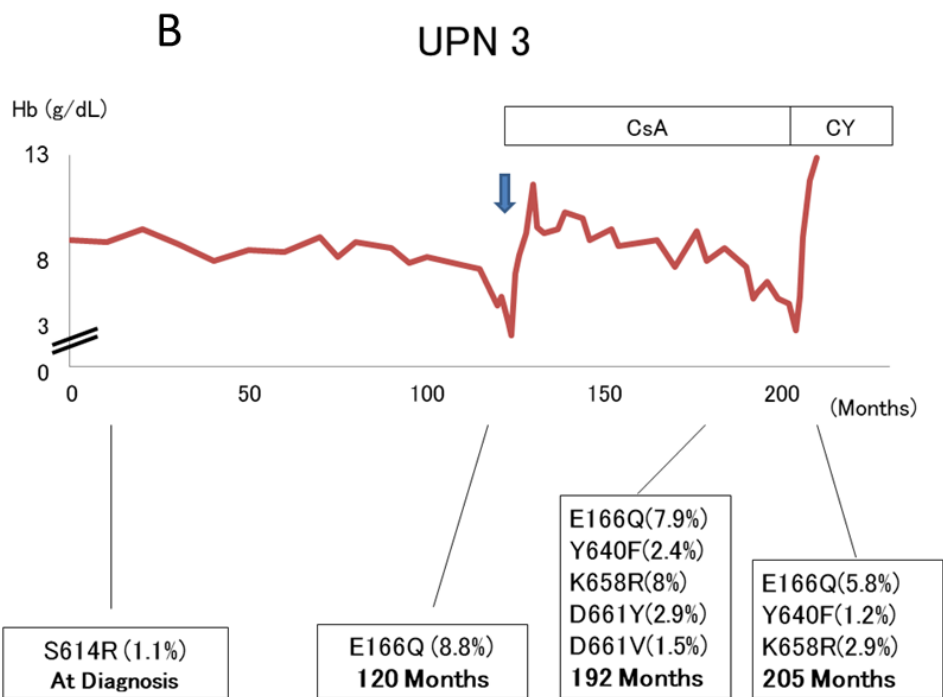

**The time course analysis of the *STAT3* gene in two patients with PRCA.** A: Unique patient number (UPN) 243, PRCA without T cell large granular lymphocytic leukemia (T-LGLL), received cyclosporine A (CsA) treatment under the diagnosis of idiopathic PRCA. She temporally responded but gradually became resistant to CsA. She had the D661V mutation at the time of her diagnosis and the variant allele frequency (VAF) of D661V increased with time.

B: UPN 3, PRCA with T-LGLL, began taking oral CsA 10 years after the diagnosis of T-LGLL to treat progressive anemia. Her anemia improved and was stable for 6 years with CsA, but she subsequently became resistant to CsA. Her anemia responded after the replacement of CsA with cyclophosphamide (CY). The *STAT3* mutation S614R (variant allele frequency; VAF 1.1%) was detected at the time of the diagnosis of T-LGLL and the E166Q (8.8%) mutation appeared when CsA therapy was started. E166Q (7.9%), Y640F (2.4%), K658R (8%), D661Y (2.9%), and D661V (1.5%) were detected at the time of CsA failure. After the administration of CY, the mutation profile became less complex.

Blue arrows indicate red blood cell transfusion.

**Supplemental Figure S4.**

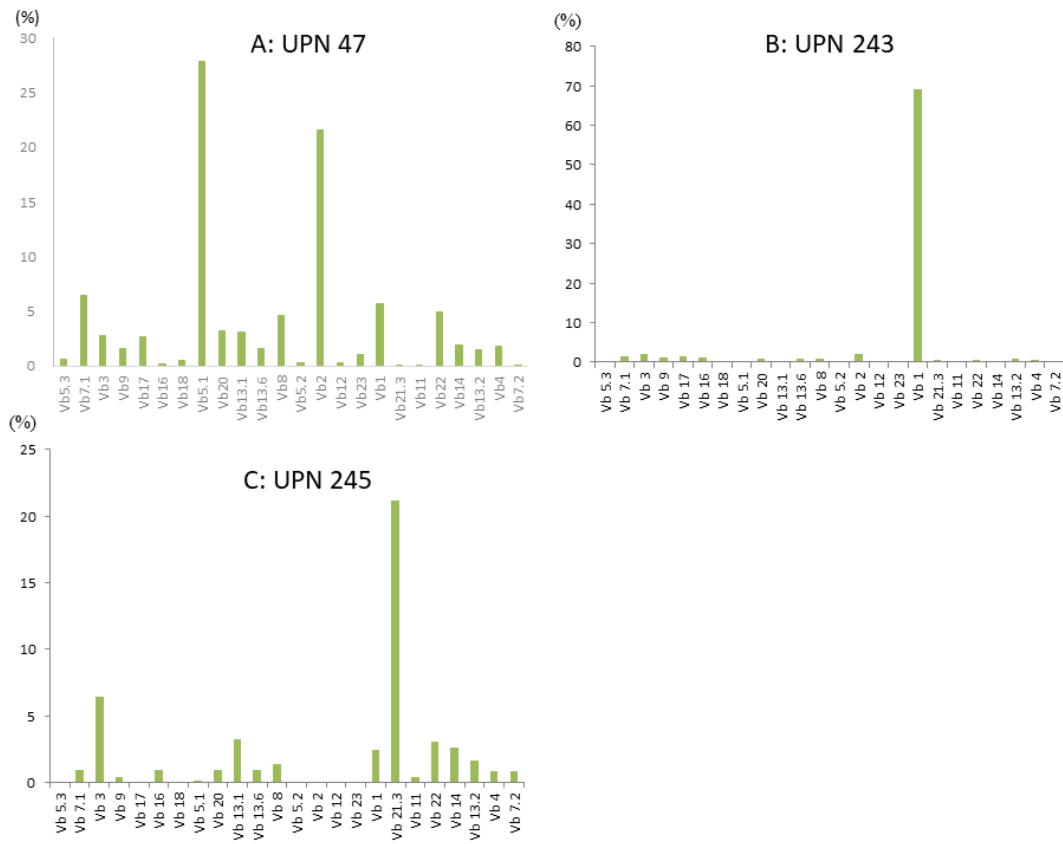

**The distributions of the TCRV $\beta$  repertoire in CD3<sup>+</sup>CD8<sup>+</sup> lymphocyte populations. A:** UPN 47 (idiopathic PRCA, positive for Y640F and D661Y mutations). **B:** UPN 243 (idiopathic PRCA, with D661V). **C:** UPN 245 (thymoma-associated PRCA, with Y640F).

Supplemental Figure S5.

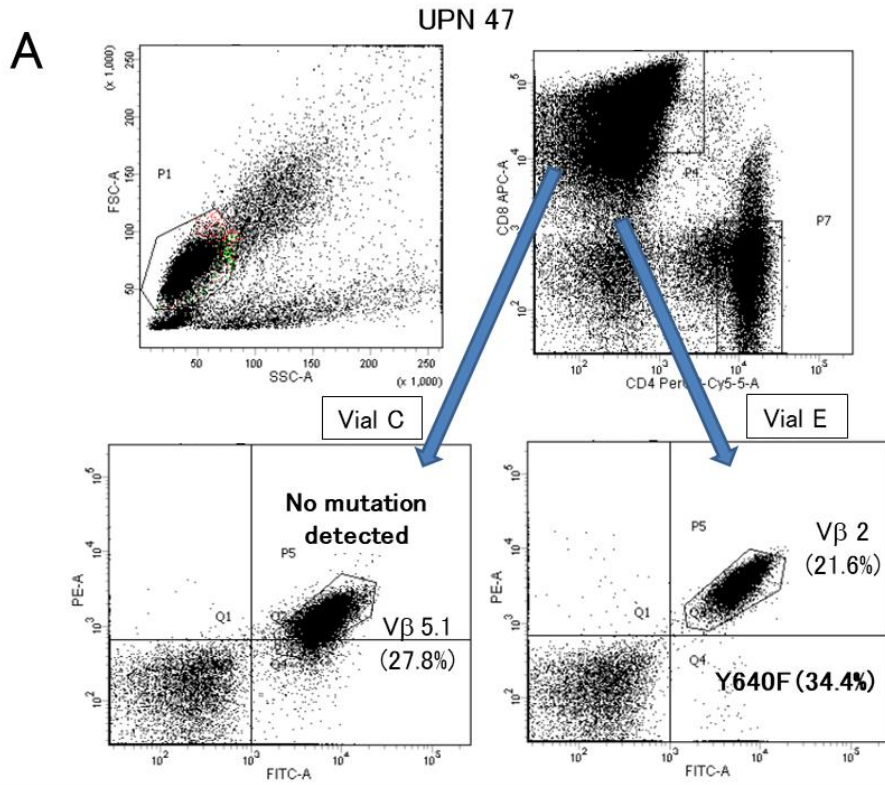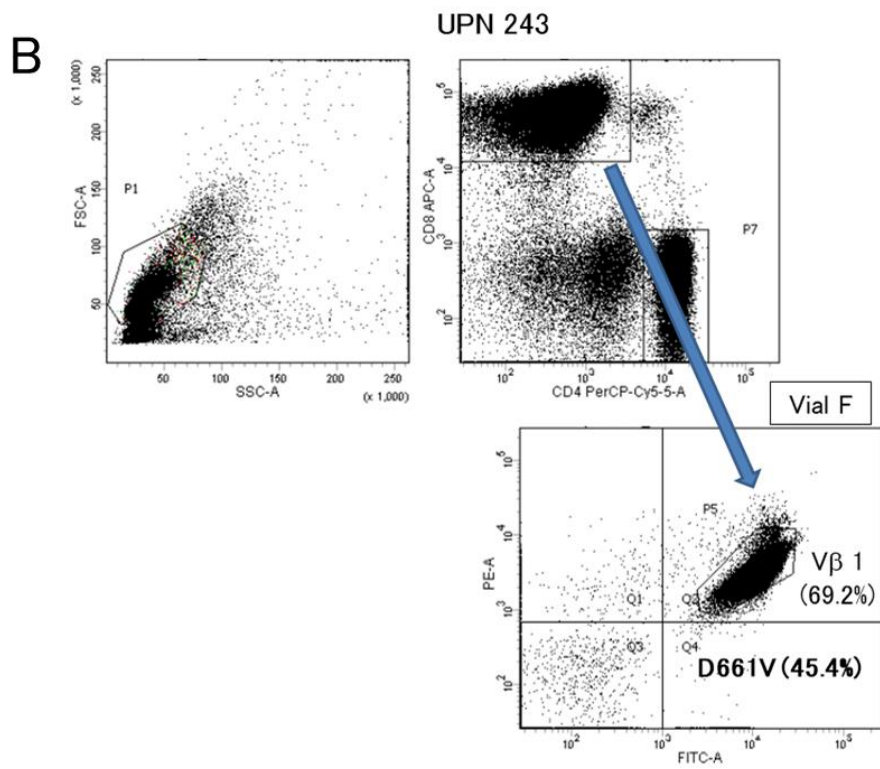

**Scatterplots of sorted T cells and the results of amplicon sequencing for the *STAT3* genes in sorted fractions.** UPN 47 represents idiopathic pure red cell aplasia (PRCA). The CD8<sup>+</sup> T cells were restricted to 27.8% of Vβ5.1 and 21.6% of Vβ2. Vβ5.1 was negative for *STAT3* mutations; however, a Y640F mutation was found in the Vβ2 population (A). UPN 243 represents idiopathic PRCA; most of the CD8<sup>+</sup> T cells expressed Vβ1 (69.2%). This abnormal Vβ fraction was positive for the *STAT3* D661V mutation (B).



Supplemental Figure S6.

# A. UPN 243

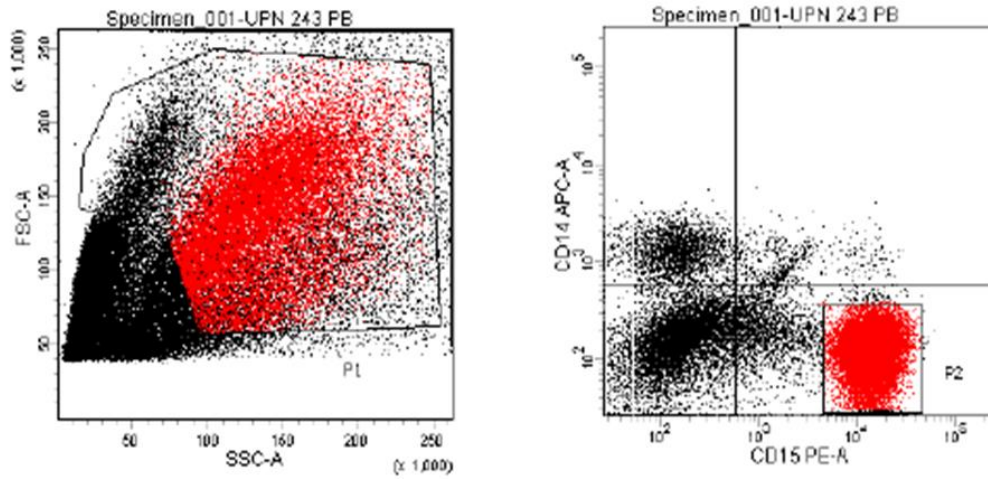

# B. UPN 3

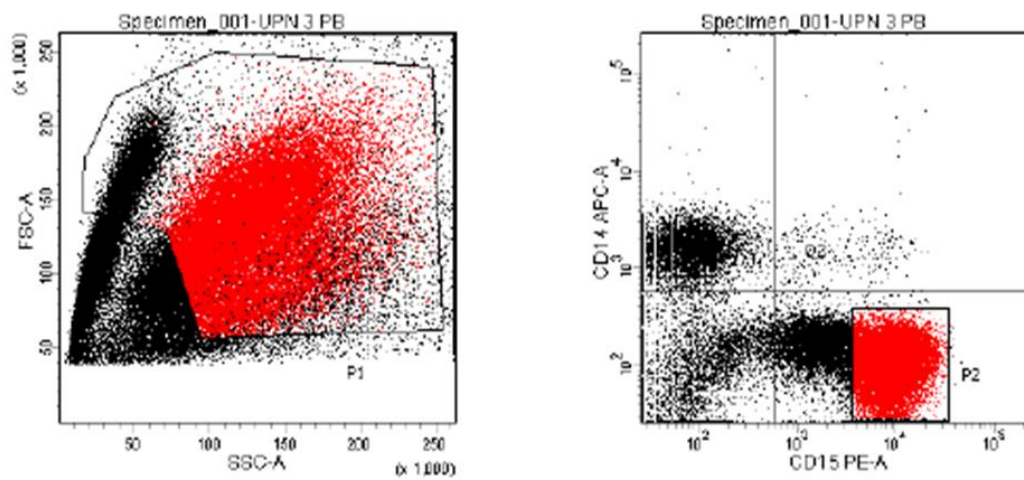

**FACS sorting of granulocytes and subsequent amplicon sequencing for the *STAT3* gene from patients with PRCA.** Granulocytes were sorted from 2 patients: UPN243 with idiopathic PRCA positive for the D661V mutation (A); and UPN 3 with PRCA associated with T-LGLL positive for the E166Q, Y640F and K658R mutations. No mutations were detected in the granulocytes. The sorted granulocyte fractions are shown in the red area.

## Supplemental Table S1: Diagnostic criteria

| aplastic anemia (AA)                                                                                     |
|----------------------------------------------------------------------------------------------------------|
| 1 clinical manifestations of anemia, bleeding or fever                                                   |
| 2 meet at least 2 of the following 3 criteria                                                            |
| 1) Hemoglobin concentration: $<100$ g/L                                                                  |
| 2) Neutrophil count: $<1.5 \times 10^9$ /L                                                               |
| 3) Platelet count: $<100 \times 10^9$ /L                                                                 |
| 3 rule out other diseases causing pancytopenia                                                           |
| 4 auxiliary findings                                                                                     |
| 1) without increased reticulocytes                                                                       |
| 2) reduction of nuclear cells, megakaryocytes, or increasing ratio of lymphocytes in BM                  |
| 3) reduced hematopoietic cells in BM biopsy                                                              |
| 4) elevated serum iron levels and lowered unsaturated iron binding capacity                              |
| 5) MRI findings of reduced hematopoietic tissue and increased fat tissue                                 |
| 5 consider the possibility of AA with 1 and 2, rule out other disorders by 3 and increase certainty by 4 |

  

| AA-paroxysmal nocturnal hemoglobinuria (PNH) |
|----------------------------------------------|
| 1 meet the diagnostic criteria for AA        |
| 2 existence of PNH-type blood cells          |
| 3 with hemolysis                             |

  

| pure red cell aplasia (PRCA)                                                                                                         |
|--------------------------------------------------------------------------------------------------------------------------------------|
| 1 chronic normocytic normochromic or macrocytic normochromic anemia with decreased or absent reticulocytes                           |
| 2 cellular marrow with markedly decreased to absent nucleated red blood cells but normal granulocytic and megakaryocytic cell series |
| 3 no apparent leukocytopenia or thrombocytopenia                                                                                     |

  

| T-cell large granular lymphocytic leukemia (T-LGLL)                                                                                         |
|---------------------------------------------------------------------------------------------------------------------------------------------|
| 1 persistent ( $>6$ months) increase in the number of peripheral blood T-cell type large granular lymphocytes (LGL) ( $> 2 \times 10^9$ /L) |
| 2 evidence of TCR $\gamma$ rearrangement is necessary when LGL count is $0.5-2 \times 10^9$ /L                                              |

BM: bone marrow, MRI: magnetic resonance imaging

## Supplemental Table S2: List of primers used for amplicon sequencing

| primer name | sequence                       | primer name | sequence                       |
|-------------|--------------------------------|-------------|--------------------------------|
| STAT3_1_F   | GTCCCATCCAGGGATAACTG           | STAT3_1_R   | CCTCCAGCTCTGCTTACTGAAT         |
| STAT3_2_F   | CAAGTAGCCGGAGGATGAAGTT         | STAT3_2_R   | GTGGTCAAAGTAGGCTTTTGAAGAAA     |
| STAT3_3_F   | AAGATCAGAATTCAATCTAGCTTTCGAGA  | STAT3_3_R   | GGAGTACGTGCAGAAAACCTCTCAC      |
| STAT3_4_F   | GGGACCAACTCCCTTATAGGGA         | STAT3_4_R   | CCTGCAGCAATACCATTGACCT         |
| STAT3_5_F   | ATGTCTCTTGACTCAAACCTGAAACCT    | STAT3_5_R   | AATCAGCTACAGCAGCTTGACA         |
| STAT3_6_F   | TGCCCGAGGCTTGTAACCTTG          | STAT3_6_R   | TCACATGTGCATTGACCTCCTTTT       |
| STAT3_7_F   | TCTGCCACAAGACGCTGAAAT          | STAT3_7_R   | TGAATGGAAACAACCAGTCAGTGA       |
| STAT3_8_F   | TGAGAAAAGAGATGCTTCCAGGAAAG     | STAT3_8_R   | GGAGAGATTGACCAGCAGTATAGC       |
| STAT3_9_F   | GCTCCCTCAGGGTCTGTAAGAA         | STAT3_9_R   | GATGAACATGGAAGAATCCAACAACG     |
| STAT3_10_F  | TGAAATGCGGACCCAAGAGTTT         | STAT3_10_R  | CCCAATTGGAACCTGGGATCAAG        |
| STAT3_11_F  | GTGCAGCTCCTCAGTCACAAT          | STAT3_11_R  | AGTTTTGCTGTGCTGCTTAGACT        |
| STAT3_12_F  | GTCAGCATGTTGTACCACAGGAT        | STAT3_12_R  | GAAGAGATTTCCAAGGCTGTGAGA       |
| STAT3_13_F  | CCGCCTTAAGATCTAAACAGAGTTAAGA   | STAT3_13_R  | GAATCTCCAGGATGACTTTGATTTCAACTA |
| STAT3_14_F  | CTAAGATAGGAGTACTTACTTGTCAATGC. | STAT3_14_R  | AAAAGGTTATGGGAGAGTTACTGACTTTTT |
| STAT3_15_F  | TTAGATGAGGGAAAGGGACAAGGA       | STAT3_15_R  | ACTTCAGACCCGTCAACAAATTAAGAA    |
| STAT3_16_F  | GCATTCCCATTTCCACGAGAAT         | STAT3_16_R  | CCCAAGCTGAAAATGTACTACTTGACT    |
| STAT3_17_F  | GTCCTTCTCCACCCAAGTGAAA         | STAT3_17_R  | GCAATAACAACATTGTTCTCTCTCTT     |
| STAT3_18_F  | GGAATGTCAGGATAGAGATAGACCAGT    | STAT3_18_R  | GATCTTTCTCTCCCATGTCCTGT        |
| STAT3_19_F  | GGGACTTGGTTACATCTGTGCA         | STAT3_19_R  | GCAGTAGACTTGGCTTTCCCAT         |
| STAT3_20_F  | CCTAACAGTGTCCCTCAGTAAAATCT     | STAT3_20_R  | GCGTGAGCCCATCTCTCTTTC          |
| STAT3_21_F  | CCCAGACCAGGGATTTGTTTTGT        | STAT3_21_R  | GTCTGCTGCTGATTTTTATTCTCTTTCTC  |
| STAT3_22_F  | CCAAACTGCATCAATGAATCTAAAAGTGC  | STAT3_22_R  | AGAGTTTGATGGCTTGTGTGTGT        |
| STAT3_23_F  | TCCGACCTATGCCCTTACTCTC         | STAT3_23_R  | GTATTCCCTCAGGTCAAGGAGTTTTT     |
| STAT3_24_F  | GCAGTAGGTGCTTGCAACTAGA         | STAT3_24_R  | CTAAGATTCAGTGAAAGCAGCAAAGAA    |
| STAT3_25_F  | AAGCTGTCACGTGAGAGCTGATG        | STAT3_25_R  | AACATATGCACACTTTGGTTTACAGTTG   |
| STAT3_26_F  | CGCCTTGCTCAGGAAAGAAAC          | STAT3_26_R  | GAGCATCGAGCAGCTGACTA           |
| STAT3_27_F  | TCCCAGTGGAAGTTTTGTCTCTG        | STAT3_27_R  | TGTCCTTCTCGTACTGTAGGCT         |
| STAT3_28_F  | CCACATACCAAGTGTGTAATTCTGC      | STAT3_28_R  | TTGGTACCTACATAGTTGATTGTCC      |
| STAT3_29_F  | ACACATTTGCTTGTGTTAGATGAGGGAT   | STAT3_29_R  | CCAACATCTGTCAGATGCCAAATG       |
| STAT3_30_F  | TCTAATATTCACTTGCCCTTGACTCT     | STAT3_30_R  | TCCCAAGGAAATCTTCTTACTTCTGTTT   |
| STAT3_31_F  | CCCTCTCTCCCTCAAGGAAAC          | STAT3_31_R  | ACAGGACACCTGCCTTTTTCTT         |
| STAT3_32_F  | ACTTTGTCCACAAAATGAAGATCTCTGA   | STAT3_32_R  | TCAAATCCCTGAGTTGAATTATCAGCTTA  |
| STAT3_33_F  | CCTTTGTAGGAAACTTTTTGCTGCA      | STAT3_33_R  | ACCTGTATACATTCCTTTGGTAATTAGCA  |
| STAT3_34_F  | GCGCCTCAGTCGTATCTTTCTG         | STAT3_34_R  | AGAGGGTGGACAACCTGAACTAGTT      |
| STAT3_35_F  | CTCCAATGCAGGCAATCTGTG          | STAT3_35_R  | ATGTTTTCTGACTTTGTTTTGGTTTCCA   |
| STAT3_36_F  | CCAAAAATTAATGCCAGGAACATGGA     | STAT3_36_R  | GGCTATAAGATCATGGATGCTACCAATATC |
| STAT3_37_F  | GTGCTGATAGAGAACATTCGACTCT      | STAT3_37_R  | TCAGAGCCATCTTTATCATCTCTCTTTT   |

### Supplemental Table S3: List of primers used for additional amplicon sequencing

| primer name   | sequence                      | primer name   | sequence                   |
|---------------|-------------------------------|---------------|----------------------------|
| STAT3_add_1_F | AGAGTTTCTCTGCCAGTGTAGTCA      | STAT3_add_2_R | ACCATCCCTCATCTAAACAAGCAAAT |
| STAT3_add_2_F | TTCCAAACTGCATCAATGAATCTAAAGTG | STAT3_add_2_R | AGAGTTGATGGCTTGIGTGIGT     |

## Supplemental Table S4: List of primers used for Sanger sequencing

| primer name        | sequence                    | primer name        | sequence                   |
|--------------------|-----------------------------|--------------------|----------------------------|
| STAT3_ex3_F        | GACTCTGCGGGTCTGTTC          | STAT3_ex3_R        | GTGTGTATGCGTCGGCTTCAGAG    |
| STAT3_ex5_F        | TGAGCTGTGATCATGCCACTGCAGCCC | STAT3_ex5_R        | GCAGCGTCTCAAGCCAAACAAGAAG  |
| STAT3_ex6_F        | CAACTCAACAACAAAACCTCAC      | STAT3_ex6_R        | TTTGAGGTTTTGGCTTCATTG      |
| STAT3_ex9_10_F     | CCTAACAGTGTCCCTCAGTAAAATC   | STAT3_ex9_10_R     | TGCTTCAGTATTCCTTCCCCTTC    |
| STAT3_ex12_13_14_F | TCCCTCAAGGAAAACACCCCAAGTTG  | STAT3_ex12_13_14_R | GTAGGCTTTTTGAAGAAACACAGAG  |
| STAT3_ex15_F       | CAAACAGTAATCATTCCACCTTCTC   | STAT3_ex15_R       | GCAGAGATGGAGTTTTGCTGTGCTGC |
| STAT3_ex18_F       | ATCCTCAGGCCGCTACCTTCA       | STAT3_ex18_R       | AGCTGATTATTTGTGGCCCATTTG   |
| STAT3_ex19_20_F    | ATCTCACCCACCAGGGGGC         | STAT3_ex19_20_R    | AGGGAAGGGCTGGGATGGCA       |
| STAT3_ex21_F       | TCCCATCGGTACCCCAACA         | STAT3_ex21_R       | GCCAGGCCACTGAACAGGGTG      |
| STAT3_ex22_F       | TCCCATTCCAGGGATAACTGAGGA    | STAT3_ex22_R       | TCCTGCCGAGGCAGATGGCT       |
| STAT3_ex23_F       | AGAGCATCACAAAAGGGGACCA      | STAT3_ex23_R       | TCCTGCCGAGGCAGATGGCT       |
| STAT3_ex24_F       | GCAGGTAGGCGCTCAGTCG         | STAT3_ex24_R       | TGCAGAGGGTGGACAACTGAACT    |

### Supplemental Table S5: Subtypes of myelodysplastic syndrome

| cohort   | UPN | Subtypes |
|----------|-----|----------|
| Nagano   | 56  | RA       |
| Nagano   | 61  | RAEB-2   |
| Nagano   | 79  | RAEB-1   |
| Nagano   | 80  | RCMD     |
| Nagano   | 82  | MDS-U    |
| Nagano   | 86  | RAEB-2   |
| Nagano   | 88  | RAEB     |
| Nagano   | 89  | RA       |
| Nagano   | 122 | RT       |
| Nagano   | 127 | RA       |
| Nagano   | 133 | RCMD     |
| Nagano   | 241 | RAEB-1   |
| Nagano   | 248 | RCMD     |
| Nagano   | 249 | RCMD     |
| Nagano   | 296 | RA       |
| Nagano   | 320 | RA       |
| Nagano   | 447 | RCMD     |
| Kanazawa | 158 | RCMD     |
| Kanazawa | 159 | RA       |
| Kanazawa | 165 | RAEB-1   |
| Kanazawa | 179 | RA       |

RA: refractory anemia

RAEB: RA with excess blasts

RCMD: refractory cytopenia with multilineage dysplasia

MDS-U: MDS, unclassifiable

RT: refractory thrombocytopenia

## Supplemental Table S6: Clinical characteristics of PRCA patients

| cohort | LPN | gender | cause of PRCA  | age, y | STAT2 mutation | WBC, $\times 10^9/L$ | lymphocyte, % | neutrophil, % | lymphocyte, $\times 10^9/L$ | neutrophil, $\times 10^9/L$ | Hemoglobin, g/L | Platelet, $\times 10^9/L$ | Reticulocyte, % | Reticulocyte, $\times 10^9/L$ | CD4, $\times 10^6/L$ | CD8, $\times 10^6/L$ | CD4/CD8 | erythroid cells in BM, % | karyotype | TCR V $\beta$ repertoire                      | TCR $\gamma$ rearrangement | therapy            | outcome | follow up duration, mo |
|--------|-----|--------|----------------|--------|----------------|----------------------|---------------|---------------|-----------------------------|-----------------------------|-----------------|---------------------------|-----------------|-------------------------------|----------------------|----------------------|---------|--------------------------|-----------|-----------------------------------------------|----------------------------|--------------------|---------|------------------------|
|        | 45  | F      | idiopathic     | 59     | negative       | 4.65                 | 23            | 71            | 1.07                        | 3.30                        | 42              | 382                       | 1.4             | 16.7                          | 0.57                 | 0.34                 | 1.68    | 2.0                      | normal    | N.T                                           | negative                   | CsA                | alive   | 20                     |
|        | 47  | F      | idiopathic     | 39     | positive       | 4.31                 | 50            | 38            | 2.16                        | 1.64                        | 71              | 405                       | 1.5             | 27.8                          | 0.95                 | 0.80                 | 1.19    | 1.6                      | normal    | *V $\beta$ 5.1 (27.8%)<br>V $\beta$ 2 (21.6%) | positive                   | mPSL, PSL, CY      | dead    | 251                    |
|        | 53  | F      | drug           | 65     | negative       | 2.88                 | 42            | 52            | 1.22                        | 1.50                        | 57              | 243                       | 0.5             | 9.2                           | 0.80                 | 0.22                 | 3.64    | 0.8                      | normal    | N.T                                           | negative                   | watch              | alive   | 1                      |
|        | 70  | M      | idiopathic     | 82     | negative       | 5.10                 | 30            | 58            | 1.54                        | 2.97                        | 48              | 168                       | 0.6             | 7.9                           | 1.11                 | 0.25                 | 4.44    | 4.4                      | normal    | N.T                                           | negative                   | PSL                | alive   | 1                      |
|        | 90  | M      | parvovirus B19 | 49     | negative       | 10.93                | 14            | 80            | 1.53                        | 8.74                        | 69              | 319                       | 0.5             | 10.9                          | 0.77                 | 0.34                 | 2.26    | 0.0                      | normal    | N.T                                           | positive                   | CsA                | alive   | 134                    |
|        | 150 | M      | AIH            | 63     | negative       | 3.96                 | 29            | 55            | 1.15                        | 2.18                        | 67              | 208                       | 0.4             | 7.0                           | *0.67                | *0.67                | *1.00   | 0.0                      | normal    | *poly                                         | negative                   | CsA                | alive   | 30                     |
|        | 166 | F      | idiopathic     | 62     | positive       | 3.90                 | N.T           | N.T           | N.T                         | N.T                         | 42              | 179                       | 0.0             | 0.0                           | N.T                  | N.T                  | N.T     | 1.2                      | normal    | N.T                                           | *negative                  | CsA                | alive   | 300                    |
|        | 171 | F      | idiopathic     | 77     | negative       | 3.84                 | 11            | 75            | 0.42                        | 2.88                        | 65              | 303                       | 0.8             | 16.0                          | 0.16                 | 0.22                 | 0.73    | 4.6                      | normal    | N.T                                           | negative                   | CsA                | alive   | 25                     |
|        | 182 | F      | CD, SjS        | 58     | positive       | 2.25                 | 22            | 67            | 0.50                        | 1.50                        | 66              | 113                       | 0.7             | 2.0                           | 0.23                 | 0.22                 | 1.05    | 3.6                      | normal    | N.T                                           | *negative                  | CsA                | dead    | 204                    |
|        | 237 | M      | AIP            | 67     | negative       | 5.68                 | 27            | 59            | 1.53                        | 3.35                        | 72              | 302                       | 0.2             | 4.1                           | 0.56                 | 0.66                 | 0.85    | 0.8                      | normal    | N.T                                           | negative                   | PSL                | dead    | 38                     |
|        | 243 | F      | idiopathic     | 70     | positive       | 2.31                 | 44            | 46            | 1.01                        | 1.06                        | 70              | 295                       | 0.3             | 6.2                           | 0.54                 | 0.43                 | 1.26    | 0.2                      | normal    | *V $\beta$ 1 (69.2%)                          | negative                   | CsA                | alive   | 59                     |
|        | 245 | M      | thymoma        | 43     | positive       | 2.96                 | 42            | 47            | 1.24                        | 1.39                        | 66              | 249                       | 0.9             | 15.9                          | *0.19                | *0.39                | *0.49   | 1.2                      | normal    | *V $\beta$ 21.3 (21.2%)                       | *positive                  | CsA, mPSL, PSL     | dead    | 85                     |
|        | 278 | F      | thymic cancer  | 78     | negative       | 5.68                 | 35            | 58            | 1.99                        | 3.29                        | 52              | 213                       | 0.2             | 3.4                           | 1.15                 | 0.40                 | 2.88    | 0.0                      | normal    | poly                                          | negative                   | watch              | alive   | 2                      |
|        | 281 | F      | idiopathic     | 81     | negative       | 3.87                 | 34            | 53            | 1.32                        | 2.05                        | 73              | 205                       | 0.1             | 2.3                           | 0.59                 | 0.48                 | 1.23    | 0.2                      | normal    | poly                                          | negative                   | CsA                | alive   | 13                     |
|        | 397 | F      | thymoma        | 48     | negative       | 4.76                 | 31            | 66            | 1.48                        | 3.14                        | 40              | 417                       | 0.5             | 7.2                           | 0.68                 | 0.72                 | 0.94    | 0.4                      | normal    | poly                                          | negative                   | thymectomy         | alive   | 6                      |
|        | 398 | F      | idiopathic     | 72     | negative       | 3.83                 | 8             | 85            | 0.31                        | 3.26                        | 53              | 296                       | 0.3             | 4.3                           | *0.21                | *0.22                | *0.95   | 5.2                      | normal    | *poly                                         | *negative                  | CsA                | alive   | 114                    |
|        | 399 | F      | idiopathic     | 67     | positive       | 3.50                 | 65            | 26            | 2.27                        | 0.90                        | 77              | 364                       | N.T             | 23.0                          | N.T                  | N.T                  | N.T     | N.T                      | normal    | N.T                                           | *negative                  | CsA, PSL           | alive   | 50                     |
|        | 411 | F      | idiopathic     | 81     | negative       | 4.70                 | 35            | 57            | 1.62                        | 2.66                        | 58              | 315                       | 0.2             | 3.9                           | 0.68                 | 0.34                 | 2.00    | 0.4                      | normal    | poly                                          | negative                   | watch              | alive   | 1                      |
|        | 3   | F      | T-L.GLL        | 20     | positive       | 6.70                 | 79            | 10            | 5.29                        | 0.67                        | 92              | 306                       | 0.9             | 23.9                          | 0.69                 | 4.45                 | 0.16    | 4.2                      | normal    | *V $\beta$ 23 (92%)                           | positive                   | CsA                | alive   | 232                    |
|        | 7   | F      | T-L.GLL        | 73     | negative       | 5.53                 | 70            | 13            | 3.87                        | 0.72                        | 91              | 426                       | 0.3             | 9.0                           | 0.61                 | 3.33                 | 0.18    | 0.4                      | normal    | N.T                                           | positive                   | CsA                | alive   | 95                     |
|        | 8   | F      | T-L.GLL        | 59     | positive       | 5.87                 | 66            | 20            | 3.87                        | 1.17                        | 99              | 276                       | 0.8             | 22.0                          | 0.82                 | 2.31                 | 0.35    | NA                       | normal    | V $\beta$ 14 (76%)<br>V $\beta$ 22 (51%)      | positive                   | watch              | alive   | 141                    |
|        | 13  | M      | T-L.GLL        | 58     | positive       | 9.72                 | 53            | 44            | 5.15                        | 4.28                        | 48              | 497                       | 0.4             | 5.0                           | 0.90                 | 4.31                 | 0.21    | 0.6                      | normal    | poly                                          | positive                   | PSL, CY, CsA       | alive   | 133                    |
|        | 37  | F      | T-L.GLL        | 45     | positive       | 19.13                | 30            | 69            | 5.74                        | 13.20                       | 100             | 318                       | 0.6             | 18.1                          | 3.15                 | 2.30                 | 1.37    | 1.6                      | normal    | N.T                                           | positive                   | mPSL, ATG, CsA, CY | alive   | 261                    |
|        | 101 | M      | T-L.GLL        | 78     | negative       | 7.17                 | 62            | 31            | 4.45                        | 2.22                        | 92              | 262                       | 0.3             | 7.5                           | 0.46                 | 1.17                 | 0.39    | 4.4                      | normal    | N.T                                           | positive                   | CsA                | alive   | 44                     |
|        | 170 | M      | T-L.GLL        | 72     | positive       | 3.50                 | 62            | 24            | 2.17                        | 0.84                        | 90              | 286                       | 0.6             | 16.8                          | 0.43                 | 1.54                 | 0.28    | 1.2                      | normal    | N.T                                           | positive                   | CsA, CY            | alive   | 24                     |
|        | 192 | F      | T-L.GLL        | 74     | positive       | 3.28                 | 29            | 60            | 0.95                        | 1.97                        | 75              | 254                       | 0.2             | 4.8                           | 0.07                 | 0.87                 | 0.08    | 0.4                      | normal    | V $\beta$ 16 (89%)                            | positive                   | CsA                | alive   | 11                     |
|        | 194 | F      | T-L.GLL        | 73     | positive       | 8.47                 | 64            | 23            | 5.42                        | 1.95                        | 86              | 584                       | 0.5             | 13.0                          | 0.49                 | 4.93                 | 0.10    | 3.4                      | normal    | V $\beta$ 3 (39.9%)                           | positive                   | CsA, CY            | alive   | 9                      |
|        | 291 | F      | T-L.GLL        | 71     | positive       | 8.75                 | 45            | 52            | 3.94                        | 4.55                        | 79              | 223                       | 0.2             | 5.1                           | 0.51                 | 3.33                 | 0.15    | 0.2                      | normal    | V $\beta$ 1 (93%)                             | positive                   | CsA                | alive   | 13                     |
|        | 293 | F      | T-L.GLL        | 65     | positive       | 11.50                | 65            | 31            | 7.48                        | 3.57                        | 71              | 519                       | 0.8             | 16.0                          | 0.26                 | 5.51                 | 0.05    | 4.3                      | normal    | *V $\beta$ 7.1 (48%)<br>V $\beta$ 3 (43%)     | positive                   | CsA                | alive   | 16                     |
|        | 452 |        | thymoma        |        | positive       |                      |               |               |                             |                             |                 |                           |                 |                               |                      |                      |         |                          |           |                                               | negative                   |                    |         |                        |
|        | 453 |        | idiopathic     |        | positive       |                      |               |               |                             |                             |                 |                           |                 |                               |                      |                      |         |                          |           |                                               | negative                   |                    |         |                        |
|        | 454 |        | idiopathic     |        | negative       |                      |               |               |                             |                             |                 |                           |                 |                               |                      |                      |         |                          |           |                                               | negative                   |                    |         |                        |
|        | 456 |        | idiopathic     |        | negative       |                      |               |               |                             |                             |                 |                           |                 |                               |                      |                      |         |                          |           |                                               | negative                   |                    |         |                        |
|        | 457 |        | thymoma        |        | negative       |                      |               |               |                             |                             |                 |                           |                 |                               |                      |                      |         |                          |           |                                               | negative                   |                    |         |                        |
|        | 458 |        | thymoma        |        | negative       |                      |               |               |                             |                             |                 |                           |                 |                               |                      |                      |         |                          |           |                                               | positive                   |                    |         |                        |
|        | 459 |        | idiopathic     |        | negative       |                      |               |               |                             |                             |                 |                           |                 |                               |                      |                      |         |                          |           |                                               | positive                   |                    |         |                        |
|        | 460 |        | thymoma        |        | negative       |                      |               |               |                             |                             |                 |                           |                 |                               |                      |                      |         |                          |           |                                               | negative                   |                    |         |                        |
|        | 461 |        | SLE            |        | negative       |                      |               |               |                             |                             |                 |                           |                 |                               |                      |                      |         |                          |           |                                               | positive                   |                    |         |                        |
|        | 462 |        | idiopathic     |        | negative       |                      |               |               |                             |                             |                 |                           |                 |                               |                      |                      |         |                          |           |                                               | negative                   |                    |         |                        |
|        | 463 |        | SLE            |        | negative       |                      |               |               |                             |                             |                 |                           |                 |                               |                      |                      |         |                          |           |                                               | positive                   |                    |         |                        |
|        | 451 |        | T-L.GLL        |        | negative       |                      |               |               |                             |                             |                 |                           |                 |                               |                      |                      |         |                          |           |                                               | negative                   |                    |         |                        |
|        | 455 |        | T-L.GLL        |        | positive       |                      |               |               |                             |                             |                 |                           |                 |                               |                      |                      |         |                          |           |                                               | positive                   |                    |         |                        |

\*Data obtained during therapy

AIH: autoimmune hepatitis, CD: Crohn's disease, SjS: Sjögren's syndrome, AIP: autoimmune pancreatitis, SLE: systemic lupus erythematosus. Data on points other than the diagnosis were not available from the Akita cohort.



**Supplemental Table S7: CADD scores for *STAT3* mutations found in this study**

| AA change | base substitution | CADD score |
|-----------|-------------------|------------|
| p.R152W   | c.C454T           | 35.0       |
| p.D170G   | c.A509G           | 29.7       |
| p.F174V   | c.T520G           | 28.9       |
| p.S614R   | c.A1840C          | 26.0       |
| p.S614R   | c.C1842A          | 25.8       |
| p.S614R   | c.C1842G          | 25.5       |
| p.G618R   | c.G1852C          | 34.0       |
| p.Y640F   | c.A1919T          | 24.2       |
| p.D661H   | c.G1981C          | 26.2       |
| p.D661Y   | c.G1981T          | 34.0       |
| p.D661V   | c.A1982T          | 25.1       |
| p.D698H   | c.G2092C          | 31.0       |

Combined Annotation Dependent Depletion (CADD) scores were calculated according to reference 33.
